# Supplementary material for: Morphologies and dynamics of the interfaces between active and passive phases
Source: Royal Society of Chemistry journal article supplement (doi:10.1039/d1sm01065d), 2021-01-01
Supplement: d1sm01065d6.pdf [file d1sm01065d6.pdf]

## Supporting Information for "Morphologies and dynamics of the interfaces between active and passive phases"

Guoqing Xu,<sup>a,b</sup> Tao Huang,<sup>c</sup> Yilong Han,<sup>\*d</sup> and Yong Chen<sup>\*a,b</sup>

<sup>a</sup>Center of Soft Matter Physics and Its Applications, Beihang University, Beijing, 100191, China.

<sup>b</sup>School of Physics, Beihang University, Beijing, 100191, China.

<sup>c</sup>Institute of Physical and Engineering Science, Faculty of Science,

Kunming University of Science and Technology, Kunming 650093, Yunnan, China.

<sup>d</sup>Department of Physics, The Hong Kong University of Science and Technology, Clear Water Bay, Hong Kong, China.

### Movies:

Movie 1: The rough sharp interface from  $t = -100$  to 900 at  $Pe = 300$  and  $\rho = 0.7$ .

Movie 2: Active particles are compressing the passive phase along the  $x$  direction during the interface propagation stage from  $t = 0$  to 150 at  $Pe = 300$  and  $\rho = 0.7$ .

Movie 3: Active (red) and passive (blue) particles form a single crystal near the interface without grain boundaries and dislocations during the relaxation stage ( $200 < t < 400$ ) at  $Pe = 300$  and  $\rho = 0.7$ . The white gap between two rows of several particles forms a slip line rapidly gliding along the lattice direction. A few percent of isolated passive particles are embedded in the active crystal, while active particles are rarely embedded in the passive crystal.

Movie 4: The rough invasive interface from  $t = -100$  to 900 at  $Pe = 300$  and  $\rho = 0.4$ .

Movie 5: The flat interdiffusive interface from  $t = -100$  to 900 at  $Pe = 300$  and  $\rho = 0.2$ .

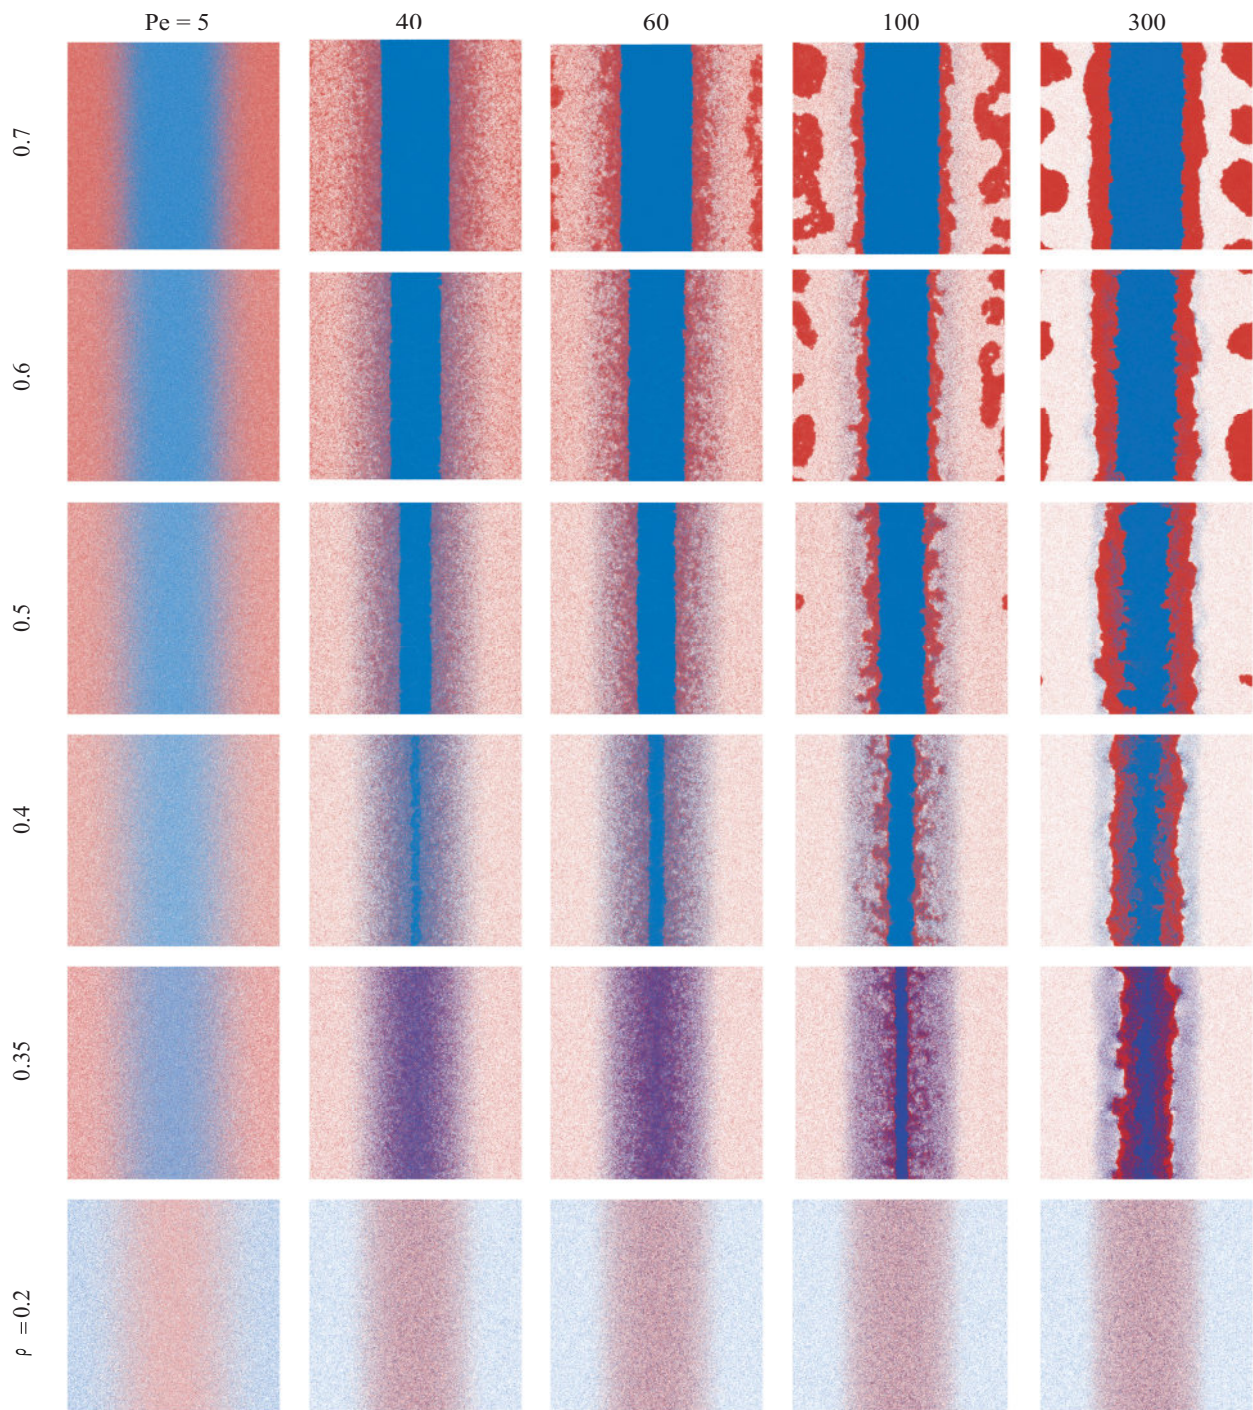

**Figure S1:** Various active-inactive interfaces in 2D mixtures of active particles (red) and passive particles (blue) with different area fractions  $\rho$  and Péclet numbers  $Pe$  in the relaxation stage ( $t = 900$ ).

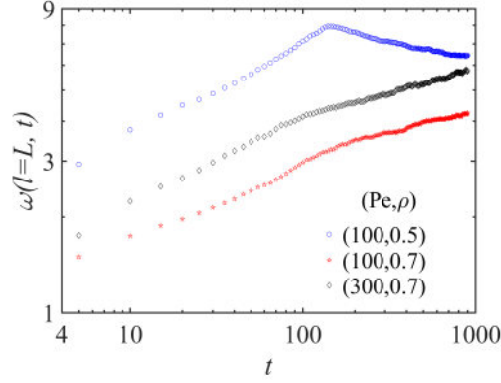

**Figure S2:** Evolution of roughness  $\omega(l=L, t)$  of the interface with the full length  $L$  in the  $y$  direction at  $(Pe, \rho) = (100, 0.5)$ ,  $(100, 0.7)$ , and  $(300, 0.7)$ .  $\omega(l=L, t)$  exhibit different power laws in the propagation and the relaxation stages.

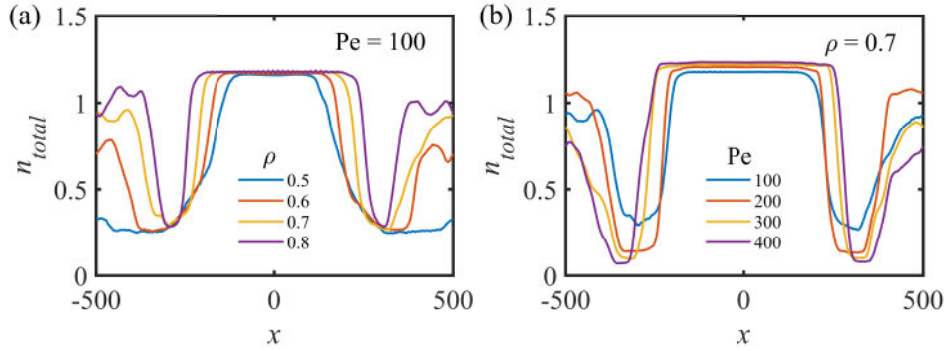

**Figure S3:** Profiles of the total density of the active and passive particles along the  $x$  direction in the relaxation stage ( $t = 900$ ) at different  $\rho$  and  $Pe$  values. (a)  $Pe$  is fixed at 100; (b)  $\rho$  is fixed at 0.7.

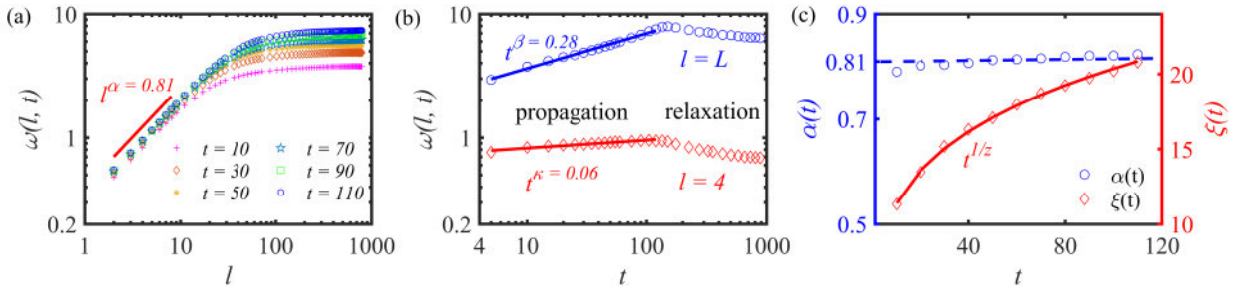

**Figure S4:** Interface roughness  $\omega(l, t)$  at  $(Pe, \rho) = (100, 0.5)$ . (a)  $\omega(l, t) \sim l^\alpha$  with the fitted  $\alpha = 0.81$  at  $l \ll \xi(t)$ . (b)  $\omega(l=L, t) \propto t^\beta$  with the fitted  $\beta = 0.28$  for the entire interface ( $l=L$ ) and  $\omega(l=4, t) \propto t^\kappa$  with the fitted  $\kappa = 0.06$  for a short section of the interface with length  $l=4 \ll \xi(t)$  in the propagation stage. In the relaxation stage,  $\omega(t)$  decreases with a different exponent. (c)  $\alpha(t)$  and  $\xi(t)$  obtained by fitting  $\omega(l, t)/t^\beta = (\frac{l}{\xi(t)})^{\alpha(t)}$  at  $l \ll \xi(t)$  in (a).  $\beta$  is obtained from the fitting in (b).  $\alpha(t)$  is nearly a constant of approximately 0.81. The fitted  $z = 3.97$  obtained by fitting  $\xi(t) \sim t^{1/z}$  is close to  $z = 3.68$  obtained from the scale relation  $z = \alpha/(\beta - \kappa)$ .

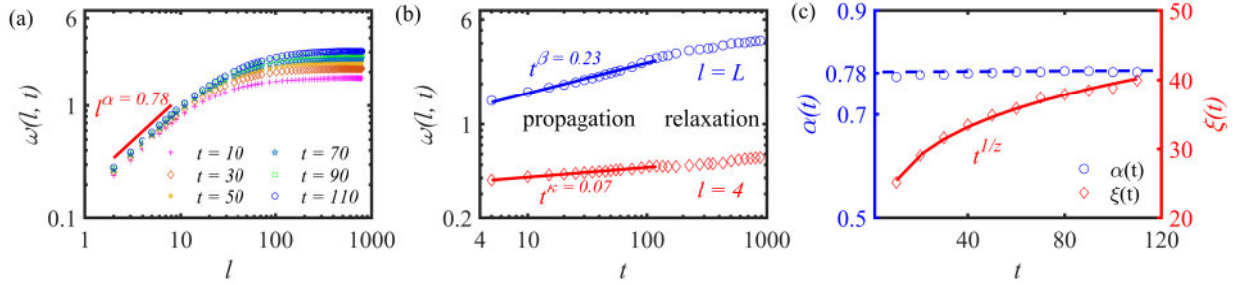

**Figure S5:** Interface roughness  $\omega(l,t)$  at  $(\text{Pe}, \rho) = (100, 0.7)$ .  $\omega(l,t) \sim l^\alpha$  with the fitted  $\alpha = 0.78$  at  $l \ll \xi(t)$ . (b)  $\omega(l=L,t) \propto t^\beta$  with the fitted  $\beta = 0.23$  for the entire interface ( $l=L$ ) and  $\omega(l=4,t) \propto t^\kappa$  with the fitted  $\kappa = 0.07$  for a short section of the interface with length  $l=4 \ll \xi(t)$  in the propagation stage. In the relaxation stage,  $\omega(t)$  increases with a different exponent. (c)  $\alpha(t)$  and  $\xi(t)$  obtained by fitting  $\omega(l,t)/t^\beta = (\frac{l}{\xi(t)})^{\alpha(t)}$  at  $l \ll \xi(t)$  in (a).  $\beta$  is obtained from the fitting in (b).  $\alpha(t)$  is nearly a constant of approximately 0.78. The fitted  $z = 5.27$  obtained by fitting  $\xi(t) \sim t^{\frac{1}{z}}$  is close to  $z = 4.88$  obtained from the scale relation  $z = \alpha/(\beta - \kappa)$ .

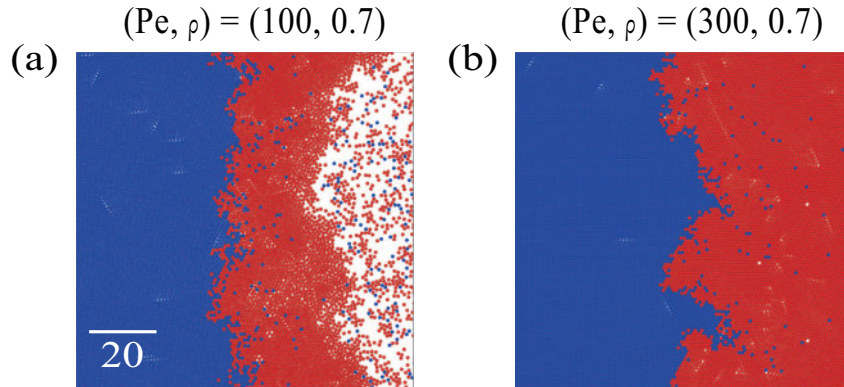

**Figure S6:** The local morphology of the sharp active-passive interfaces in the relaxation stage ( $t = 900$ ) at  $(\text{Pe}, \rho) = (100, 0.7)$  in (a) and  $(300, 0.7)$  in (b). The local slope of the interface becomes steeper at the higher  $\text{Pe}$ , i.e., higher activity, in (b).
